# Supplementary material for: Climate Change Skeptics’ Environmental Concerns and Support for Clean Energy Policy: A Case Study of the US Pacific Northwest
Source: MDPI journal article supplement (doi:10.3390/cli11110221), 2023-11-02
Supplement: s1 [file s1]

## Supplementary Materials

**Table S1**

Environmental Concern Scale

Survey question: To what extent are you concerned about the following situations? not at all concerned=1 to very concerned=7 (Cronbach's  $\alpha=0.96$ )

| Survey item                                       | Mean | Standard deviation |
|---------------------------------------------------|------|--------------------|
| Coral bleaching                                   | 4.22 | 1.78               |
| Plastic in the ocean                              | 5.15 | 1.75               |
| Drought                                           | 4.43 | 1.75               |
| Heat waves                                        | 4.04 | 1.76               |
| Stronger forest fires                             | 4.84 | 1.78               |
| Sea level rising                                  | 4.07 | 1.80               |
| Ice caps melting                                  | 4.08 | 1.86               |
| The expanding territory of vector-borne illnesses | 4.36 | 1.74               |
| Deforestation                                     | 4.77 | 1.76               |
| Habitat destruction                               | 4.76 | 1.73               |
| Overpopulation                                    | 4.56 | 1.94               |
| Air pollution                                     | 4.86 | 1.69               |
| Animal species extinction                         | 4.68 | 1.79               |
| Monarch butterfly population loss                 | 4.14 | 1.77               |
| Bee population loss                               | 4.93 | 1.81               |
| Declining water quality                           | 4.86 | 1.78               |
